# Supplementary material for: Meta-analysis of the impacts of global change factors on soil microbial diversity and functionality
Source: PubMed Central journal article supplement (PMC7300008; doi:10.1038/s41467-020-16881-7), 2020-06-17
Supplement: 41467_2020_16881_MOESM4_ESM.pdf [file 41467_2020_16881_MOESM4_ESM.pdf]

### **Description of Additional Supplementary Files**

File Name: Supplementary Data 1

Description: The dataset supporting the findings of this study for site, microbial alpha diversity and function.

File Name: Supplementary Data 2

Description: The dataset supporting the findings of this study for microbial beta diversity and community composition.

File Name: Supplementary Data 3

Description: A table summarizing basic characteristics of the dataset of this study.

File Name: Supplementary Software 1

Description: The R codes used to generate the results and figures reported in the paper.
